# Supplementary material
Source: PubMed Central journal article supplement (PMC8840971)
Supplement: NIHMS1759015-supplement-Supplementary_Methods_Data_and_Tables_-9-26-2021_pdf.pdf [file NIHMS1759015-supplement-Supplementary_Methods_Data_and_Tables_-9-26-2021_pdf.pdf]

1 **Supplementary Methods**

2  
3  
4 **Histochemistry Staining**

5  
6 Immunohistochemistry was performed with VECTASTAIN Elite ABC peroxidase kit  
7 following manufacturer's instructions (Vector Laboratories, Burlingame, CA, USA) and  
8 counterstained with Novocastra Hematoxylin (Leica, Newcastle upon Tyne, UK). 5 µm  
9 sections were stained with CD73 (Sigma-Aldrich, St. Louis, MO, USA), Ki67 (12202, Cell  
10 Signaling Technology, Danvers, MA, USA), and cleaved caspase-3 (9579, Cell Signaling  
11 Technology, Danvers, MA, USA) antibodies.

12 The intensity score for immunohistochemistry was calculated by examining the  
13 stain intensity (0 = none; 1 = weak; 2 = intermediate, 3 = strong) and the proportion of the  
14 percentage of positively stained cell (0 = none; 1 = <5%; 2 = 5–25%; 3 = 26–50%; 4 =  
15 51–75%; 5 = >75%). These scores were multiplied together to generate the final  
16 histoscore. Images were captured at 20X.

17 H&E staining was performed by deparaffinization and hydration through graded  
18 xylenes and ethanol before submerging in water. Slides were exposed to Gill hematoxylin  
19 stain (Fisher Chemical, Geel, Belgium) for 5 min, rinsed, exposed to acid alcohol (75%  
20 ethanol + 1/25000 HCl %v/v), rinsed, and incubated within an ammonia solution (0.084%  
21 NH<sub>4</sub>OH %w/v), before submerging in water for 5 min. Slides were exposed to 80%  
22 ethanol before submerging in alcoholic eosin Y 515 (Leica) for 2 min. Slides were then  
23 exposed to 95% and 100% ethanol before submerging in xylene for 2 min each. Images  
24 were captured at 10X.

25 Representative images were taken by finding three tissues near the median cohort  
26 weight and volume was used to break a tie. In the case of survival, the three tissues near

27 the median survival were used. Three tissues were examined and the tissue with the  
28 median Ki67 was chosen to be the representative tissue.

### 29 30 **qRT-PCR**

31  
32 RNA isolation and qRT-PCR was performed as described previously [1], but analyzed on  
33 QuantStudio 5 Real-Time PCR System (Thermo Fisher Scientific, Waltham, MA, USA).  
34 Primers used for *Nt5e* were 5'-GGACATTTGACCTCGTCCAAT-3' (forward) and 5'-  
35 GGGCACTCGACACTTGGTG-3' (reverse), and 5'-GGCTGTATTCCCCTCCATCG-3'  
36 (forward) and 5'-CCAGTTGGTAACAATGCCATGT-3' (reverse) for *Actb*.

### 37 38 **Immunoblotting**

39  
40 Protein isolation and western blotting were performed as described previously [2], but  
41 with nitrocellulose membranes. In short, cells were washed twice with PBS and utilized  
42 radio-immunoprecipitation assay for lysis by shaking for 10 min on ice. Lysates were  
43 centrifuged at 13000 rpm for 10 min at 4°C to collect the supernatant. Bradford assay was  
44 used to determine the protein concentration. An equal amount of protein was loaded in  
45 each well for western blotting. Specific proteins were probed by using primary antibodies  
46 against CD73 (Cell Signaling Technology) and actin (JLA20; Developmental Studies  
47 Hybridoma Bank, IA, USA).

### 48 49 **Flow cytometry**

50  
51 Peripheral blood was collected through submandibular bleeding [3] in accordance with  
52 IACUC, lysed with ACK buffer (150mM NH<sub>4</sub>Cl, 10mM KHCO<sub>3</sub>, 0.1 mM EDTA, pH 7.3),  
53 and processed for BD LSRII by staining with LIVE/DEAD Fixable Aqua Dead Cell Stain  
54 Kit (Life Technologies Corporation, Eugene, OR, USA). Sample volumes were then split

55 in half with primary conjugated antibodies CD3 $\epsilon$  (100206, PE), CD19 (115520, PE-Cy7),  
56 CD8 $\alpha$  (100711, APC), CD4 (100414, APC-Cy7), and FoxP3 (126421, AF700) from  
57 BioLegend (San Diego, CA, USA) to examine T cell subsets. Myeloid subsets were  
58 examined in the second half with Ly6G (127614, APC), Ly6C (128025, APC/Cy7), F4/80  
59 (123120, AF488), Nos2 (696804, AF594) CD11b (101257, BV605), CD11c (117318,  
60 PE/CY7) from BioLegend and CD11b (48-0112-82, e450) from Thermo Fisher Scientific  
61 and Arg1 (1C5868N, AF700) from R&D Systems. Samples were run on a BD LSR II and  
62 analyzed with FlowJo version 10. The pilot study utilized LIVE/DEAD Fixable Aqua Dead  
63 Cell Stain, CD3 $\epsilon$  (100206, PE), CD8 $\alpha$  (100706, FITC), and CD4 (100414, APC-Cy7) from  
64 BioLegend.

#### 65 66 **Mass spectrometry of interstitial fluid**

67  
68 The interstitial fluid was collected as described previously [4, 5]. Briefly, blood was rinsed  
69 quickly off tumors before incubating in 250 $\mu$ L saline on ice for 5 min. An additional 250 $\mu$ L  
70 saline was given and sporadically mixed by inverting for 10 min. A 5 s spin was performed  
71 on a mini-centrifuge before separating tissue from interstitial fluid and freezing in liquid  
72 nitrogen. The interstitial fluid was thawed and the supernatant was taken after a spin at  
73 1200 rpm at 4 $^{\circ}$ C for 10 min. Standards were made and processed in parallel with  
74 interstitial fluid by taking 200 $\mu$ L of the supernatant or standard and adding 800 $\mu$ L of LC-  
75 MS grade methanol on dry ice. Samples were then transferred to a -80 $^{\circ}$ C freezer for 2 h.  
76 Samples were spun at 13000 rpm for 10 min and the supernatant was placed in a  
77 speedvac until dry. Resuspension was done with LC-MS grade  
78 methanol/water/acetonitrile (60:30:10 %vol/vol/vol) and ran through a LC-MS/MS with

79 standards. Quantification of peak areas were performed using MassLynx (Waters Co.,  
80 Milford, MA, USA) and normalized with the tumor weight used.

81  
82 **Co-culture assays to examine the effect of MDSCs on T cell activation**

83 CD4<sup>+</sup> and CD8<sup>+</sup> T cells were harvested from the spleen of healthy immunocompetent  
84 C57/B6 mice. MDSCs were harvested from pancreatic tumor-bearing mice using  
85 magnetic isolation kit (130-094-538, Miltenyi Biotec, Inc). To determine the effect of  
86 MDSCs on T cell activation (cytokine analysis), CFSE-labeled CD4<sup>+</sup>/CD8<sup>+</sup> T cells were  
87 co-cultured with or without MDSCs and stimulated *in vitro* for 48 h (Cytokine analysis)  
88 with anti-CD3/CD28 Dynabeads (Cat #, 11132D, Thermo Fisher Scientific). For  
89 proliferation analysis, the isolated CD4<sup>+</sup>/CD8<sup>+</sup> T cells were pre-stained with CFSE (Cat#,  
90 C34554 Thermo Fisher Scientific) and co-cultured in the presence or absence of MDSCs  
91 and stimulated *in vitro* for 96 h with anti-CD3/CD28 Dynabeads and recombinant mouse  
92 IL-2 (20ng/mL, Cat # 212-12, PeproTech, Cranbury, NJ). The expression of IFN $\gamma$ , IL10,  
93 and TGF $\beta$  and the intensity of CFSE signaling were detected by flow cytometry.

94

95 **Immunofluorescent imaging CD8 and CD4 cells**

96 Pancreatic tumors were examined for CD4<sup>+</sup> and CD8<sup>+</sup> T cells using fluorescent  
97 immunohistochemistry. Briefly, freshly harvested tumors were embedded in OCT (Cat#,  
98 4583, Sakura Finetek, Torrance, CA), and frozen sections of 6- $\mu$ m thickness tumor  
99 tissues were fixed in 4% paraformaldehyde at room temperature for 10 min. Tumor  
100 sections were stained with fluorescent anti-CD4 (Cat #, 100401, BioLegend) or anti-CD8a  
101 (Cat #, 100701 BioLegend) overnight at 4°C in a humidified chamber. Subsequently,  
102 slides were washed and mounted with ProLong™ Diamond Antifade Mountant with DAPI

103 (Cat# P36962, Thermo Fisher Scientific). Images were captured with a Zeiss 710 Meta  
104 Confocal Laser Scanning Microscope and analyzed using the Zeiss Zen Blue software  
105 (Carl Zeiss Microscope, LLC, NY, USA). The CD4<sup>+</sup> and CD8<sup>+</sup> cells were counted in  
106 randomly selected 1.5 m<sup>2</sup> image areas.

107

#### 108 **Animal cohort sizes and statistics**

109 The luciferase study was performed in female B6(Cg)-Tyrc-2J/J mice implanted with  
110 KPC1245 control (n=7), sh*Nt5e-a* (n=10), and sh*Nt5e-b* (n=10). Examining time point  
111 differences with KPC1245 began with control (n=15), sh*Nt5e-a* (n=15), and sh*Nt5e-b*  
112 (n=14) implanted mice and examined mice at day 20 (n=4 each cohort) and at day 30  
113 using the remaining mice. The presence of metastasis was examined and analyzed using  
114 a Fisher's exact test. Animal survival and growth kinetics were performed in female  
115 B6(Cg)-*Tyr<sup>c-2J</sup>/J* mice implanted with control (n=15), sh*Nt5e-a* (n=15), and sh*Nt5e-b*  
116 (n=10) KPC1199 cell lines. Male B6(Cg)-*Tyr<sup>c-2J</sup>/J* mice implanted with control (n=14),  
117 sh*Nt5e-a* (n=16), and sh*Nt5e-b* (n=20) KPC1199 were used for tumor burden analysis  
118 upon necropsy, cytokine array, and peripheral blood immune profiling. 6-8 week old male  
119 Taconic athymic nude mice (CrTac:NCr-Foxn1nu) were implanted with KPC1199 control  
120 (n=14), sh*Nt5e-a* (n=10), and sh*Nt5e-b* (n=9) cell lines. C57BL/6NTac male mice were  
121 used to model immune depletion, in which KPC1245 control cell-implanted mice were  
122 treated with anti-IgG2 $\alpha/\beta$  (n=10), anti-CD4 (n=10), and anti-CD8 (n=9), and KPC1245  
123 sh*Nt5e-b*-implanted mice were treated with anti-IgG2 $\alpha/\beta$  (n=10), anti-CD4 (n=10), and  
124 anti-CD8 (n=9). To examine the effects of GM-CSF and MDSCs, cohorts with Sg NT-  
125 implanted cells were treated with anti-IgG2 $\beta$  (n=11), GM-CSF (n=10), Sg NT with GM-  
126 CSF and anti-Gr-1 (n=11) and knockout cell-implanted mice with IgG2 $\beta$  (n=10), GM-CSF

127 (n=9), Sg NT with GM-CSF and anti-Gr-1 (n=11). However, one mouse from Sg NT IgG2 $\beta$   
128 was later removed due to a poor implantation and one mouse from Sg NT GM-CSF due  
129 to a premature death the night before the necropsy. Combination therapy used saline  
130 (n=18), anti-Cd73 antibody (n=20), gemcitabine (n=20), and the combination of the two  
131 (n=20) was administered to KPC1245-implanted C57BL/6NTac male mice. Survival for  
132 all mice was examined for significance with a Mantel-Cox log-rank test and tumor burden  
133 was examined with a one-way ANOVA with Dunnett's multiple comparison test for  
134 significance, except when mentioned otherwise. Growth kinetics were examined for  
135 significance using a two-way ANOVA with a Bonferroni post-test, except for the  
136 knockdown anti-CD4 and anti-CD8 depletion study, as well as anti-CD73 with  
137 gemcitabine therapy study. These studies overcame mice deaths using generalized linear  
138 mixed model for longitudinal log-normal data incorporating compound symmetry  
139 correlation among longitudinal data from the same subjects.

140

#### 141 **Metastasis scoring**

142 After euthanasia and subsequent necropsy, mice were evaluated for presence of  
143 metastasis by gross examination, which visually inspected the spleen, liver, stomach,  
144 intestines, lymph, mesentery, peritoneum, and the diaphragm for metastasis.

145

#### 146 **Statistics and sample sizes**

147 TCGA dataset utilized normal adjacent tissue (n=4) for the mean and standard deviation  
148 to examine patients with *NT5E* mRNA expression two Z-scores above (n=19), below  
149 (n=0), or within two Z-scores (n=131) of normal adjacent tissue. IQR survival analysis

150 examined the upper (n=38), lower (n=35), and middle interquartile range (n=73).  
151 Differences in quartile sample size is due to first generating quartiles based on mRNA  
152 expression before examining if the patient was diagnosed with pancreatic ductal  
153 adenocarcinoma with clinical data. ICGC did not have normal samples, and hence a Z-  
154 score could not be generated, therefore the upper quartile (n=24) and the lower quartile  
155 (n=24) were examined. Both analyses used Mantel-Cox log-rank test for significance.  
156 qPCR utilized technical replicates for each group (n=4) and used Kruskal-Wallis test with  
157 a Dunn's posttest comparing each knockdown to the control. Peripheral blood flow  
158 cytometry consisted of control (n=7), sh*Nt5e-a* (n=8), and sh*Nt5e-b* (n=7) mice and tumor  
159 flow cytometry consisted of control (n=10), sh*Nt5e-a* (n=6), and sh*Nt5e-b* (n=9) mice  
160 tumors which was compared with a one-way ANOVA with a Dunnett's multiple  
161 comparison test. Co-culture was performed without MDSCs (n=5), control with MDSCs  
162 (n=5), sh*Nt5e-a* with MDSCs (n=5), and sh*Nt5e-b* with MDSCs (n=5) and analyzed with  
163 a one-way ANOVA with a Tukey's multiple comparison test. The tumor cytokine array  
164 contained 7 tumors from each group using Dunnett's multiple comparison test for  
165 significance.

166 The ANOVA analyses and Pearson's correlation checked normality assumptions  
167 using summary statistics including mean, median, Kurtosis, and Shapiro-Wilk test. A p  
168 value of less than 0.05 was considered significant. All error bars represent standard error  
169 of mean. All animal experiments were replicated once.

170

171

172

173 **Supplementary references**

174 1 Shukla SK, Dasgupta A, Mehla K, Gunda V, Vernucci E, Soucek J *et al.* Silibinin-  
175 mediated metabolic reprogramming attenuates pancreatic cancer-induced cachexia and  
176 tumor growth. *Oncotarget* 2015; 6: 41146-41161.

177  
178 2 Gunda V, Soucek J, Abrego J, Shukla SK, Goode GD, Vernucci E *et al.* MUC1-Mediated  
179 Metabolic Alterations Regulate Response to Radiotherapy in Pancreatic Cancer. *Clin*  
180 *Cancer Res* 2017; 23: 5881-5891.

181  
182 3 Golde WT, Gollobin P, Rodriguez LL. A rapid, simple, and humane method for  
183 submandibular bleeding of mice using a lancet. *Lab Anim (NY)* 2005; 34: 39-43.

184  
185 4 Sullivan MR, Danai LV, Lewis CA, Chan SH, Gui DY, Kunchok T *et al.* Quantification of  
186 microenvironmental metabolites in murine cancers reveals determinants of tumor nutrient  
187 availability. *Elife* 2019; 8.

188  
189 5 Haslene-Hox H, Oveland E, Berg KC, Kolmannskog O, Woie K, Salvesen HB *et al.* A new  
190 method for isolation of interstitial fluid from human solid tumors applied to proteomic  
191 analysis of ovarian carcinoma tissue. *PLoS One* 2011; 6: e19217.

192

193

194



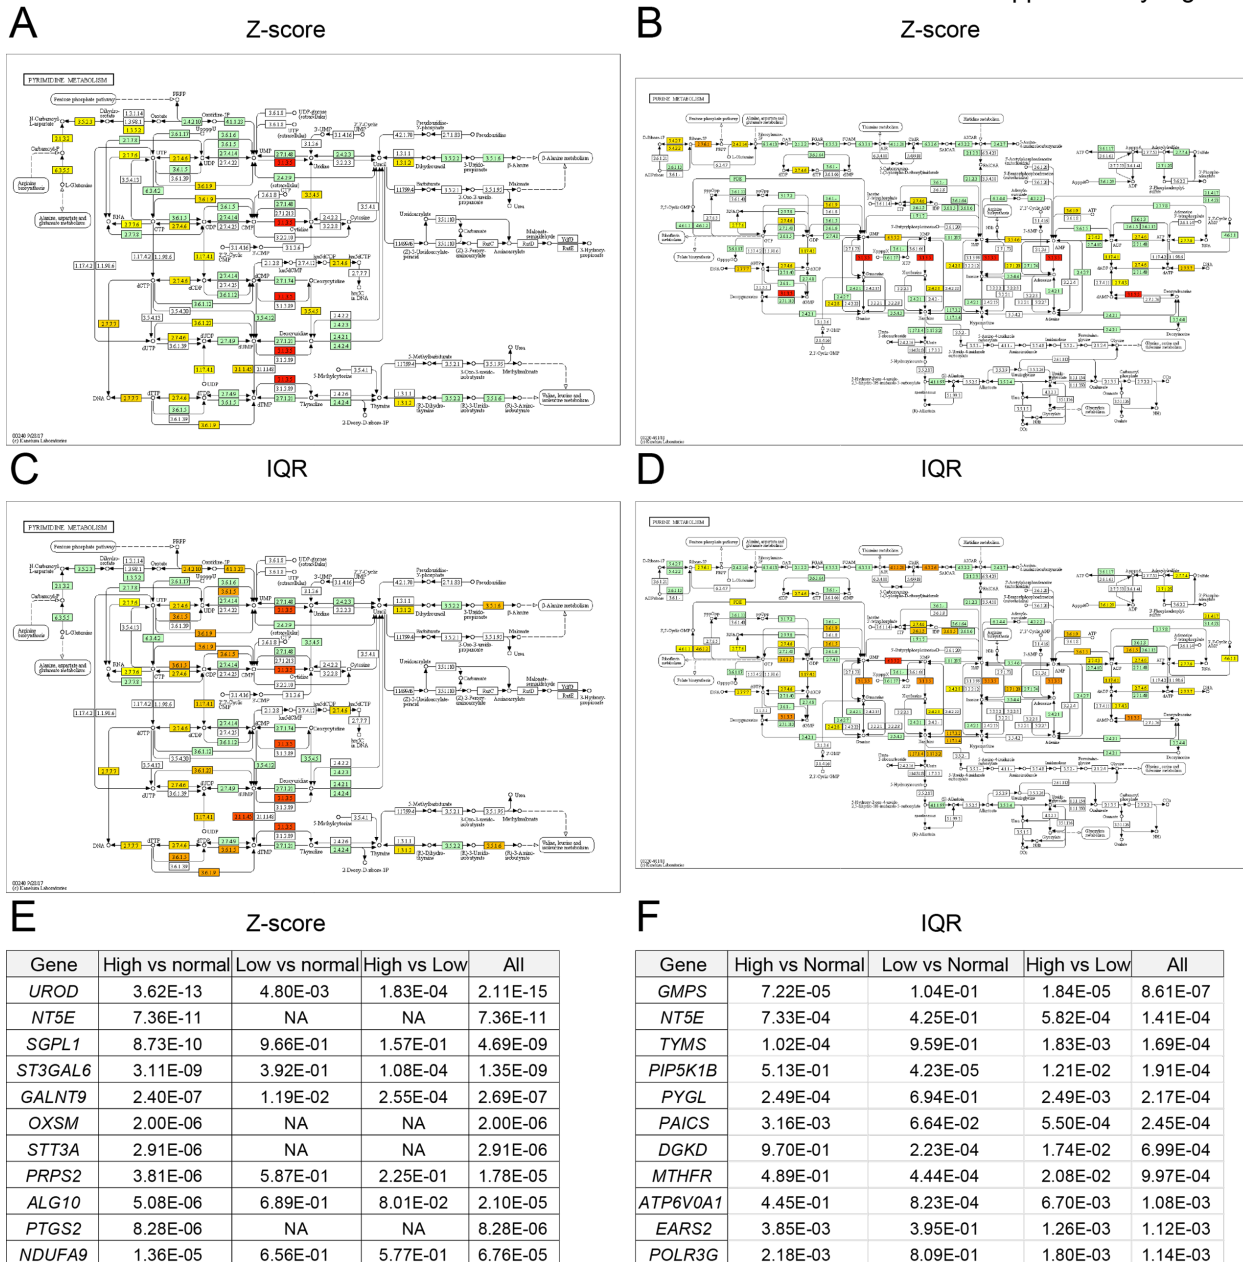

197  
 198 **Supplementary Figure 1. Pyrimidine and purine pathways are enriched in the**  
 199 **survival-associated enzyme cohorts. A-B** Kyoto Encyclopedia of Genes and  
 200 **Genomes' (KEGG) pyrimidine (A) and purine (B) metabolism pathways were colored**  
 201 **according to Mantel-Haenszel log-rank survival p-value of genes when separating cohorts**  
 202 **that are two standard deviations away from normal adjacent tissue mRNA (Z-score). C-D**  
 203 **KEGG's pyrimidine (C) and purine (D) metabolism pathways colored according to Mantel-**  
 204 **Haenszel log-rank survival p-value, however, patients were split into cohorts by the**  
 205 **interquartile range (IQR) of a given gene. Genes are colored based on the Mantel-**  
 206 **Haenszel log-rank survival p-value < 0.05. Yellow indicates a weaker significant p-value,**

207 orange indicates a moderately significant p-value, and red indicates the top spectrum of  
208 the most significant p-value. Green indicates it was not seen as significant, whereas white  
209 boxes indicate a non-human gene in the database. The color-coding scale for Z-score  
210 and IQR charts are independent of each other. All enzymes within each cohort impact the  
211 color scale regardless of their presence within a displayed pathway. **E** Z-score enzyme  
212 survival p-values when ranked by high vs. normal mRNA expression. **F** IQR enzyme  
213 survival p-values when ranking by all cohorts.  
214

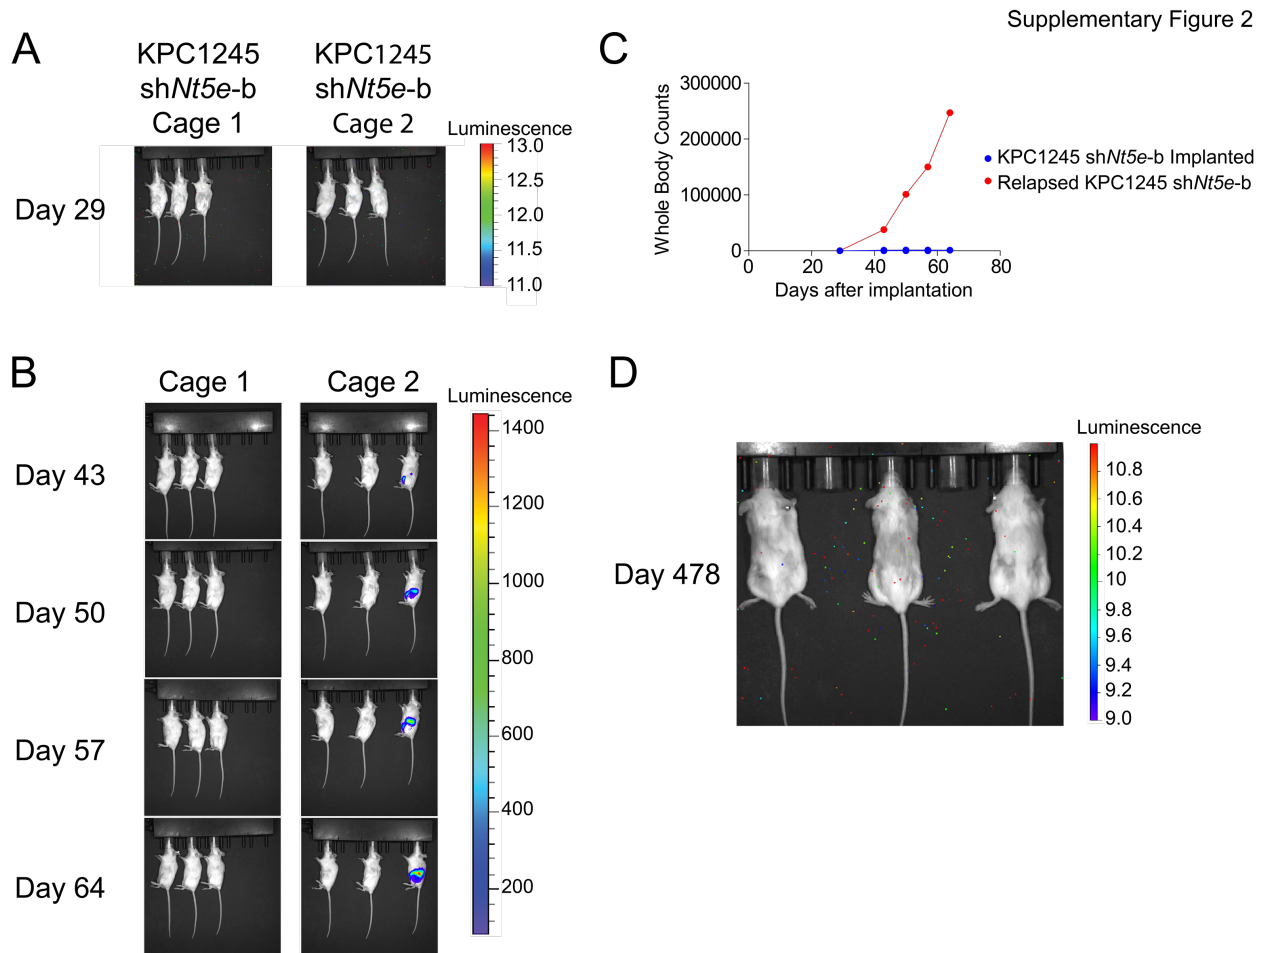

216  
217  
218  
219  
220  
221  
222  
223  
224  
225  
226  
227  
228  
229

**Supplementary Figure 2. Long term survival and relapse observed in CD73 knockdowns.** B6(Cg)-*Tyr<sup>c-2J</sup>/J* mice were orthotopically implanted with  $5 \times 10^3$  luciferase positive KPC1245 *Nt5e* knockdown or control cells. Upon necropsy, control mice had tumors while little-to-no tumor was observed in shNt5e-a (n=10) and shNt5e-b (n=4). The remaining mice (n=6) were spared and monitored if they will develop a tumor. **A** Mice were injected with luciferin to detect any tumor, as it appeared negative in the necropsy. **B** Mice were observed weekly and found one mouse that developed a tumor. **C** Whole-body counts with the same area were measured for each mouse. The red line indicates the mouse that developed a tumor, while the blue lines are the other mice. The observation ended several weeks later; however, one more mouse developed a tumor and died on day 175. **D** 478 days later, cage 1 was examined for presence a luminescence signal after injecting luciferin.

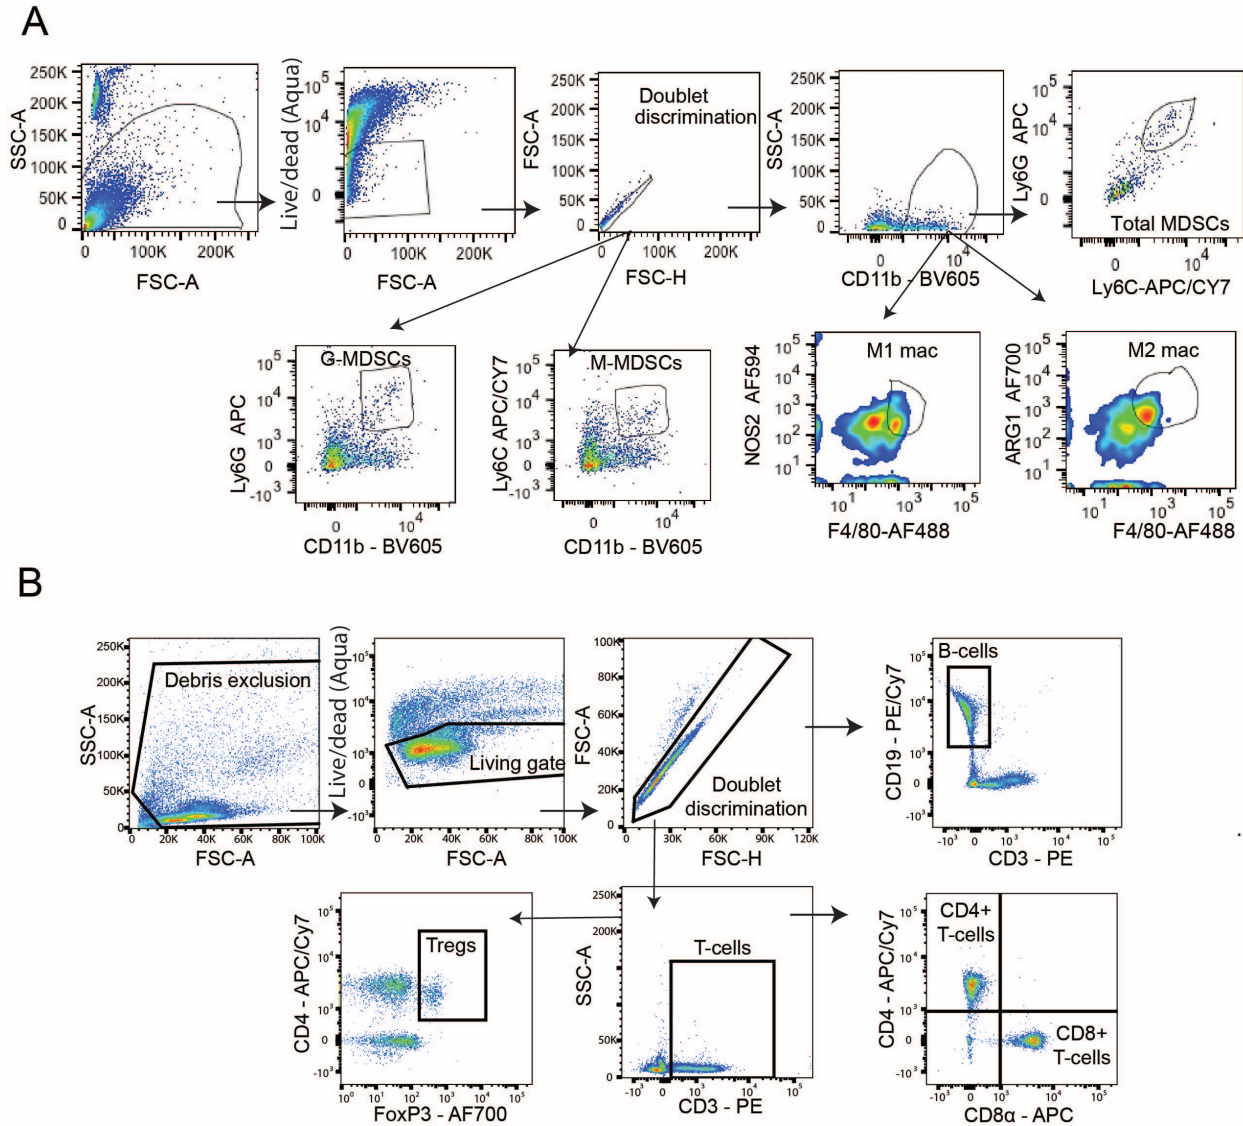

231  
 232  
 233  
 234  
 235  
 236

**Supplementary Figure 3: Schematic representation of the gating strategy for immune cell profiling in tumor and blood from pancreatic tumor-bearing mice. A** Schematic flow for analyzing G-MDSCs, M-MDSCs, M1-macrophages and M2-macrophages. **B** Schematic flow for analyzing T cells in blood and tumors.

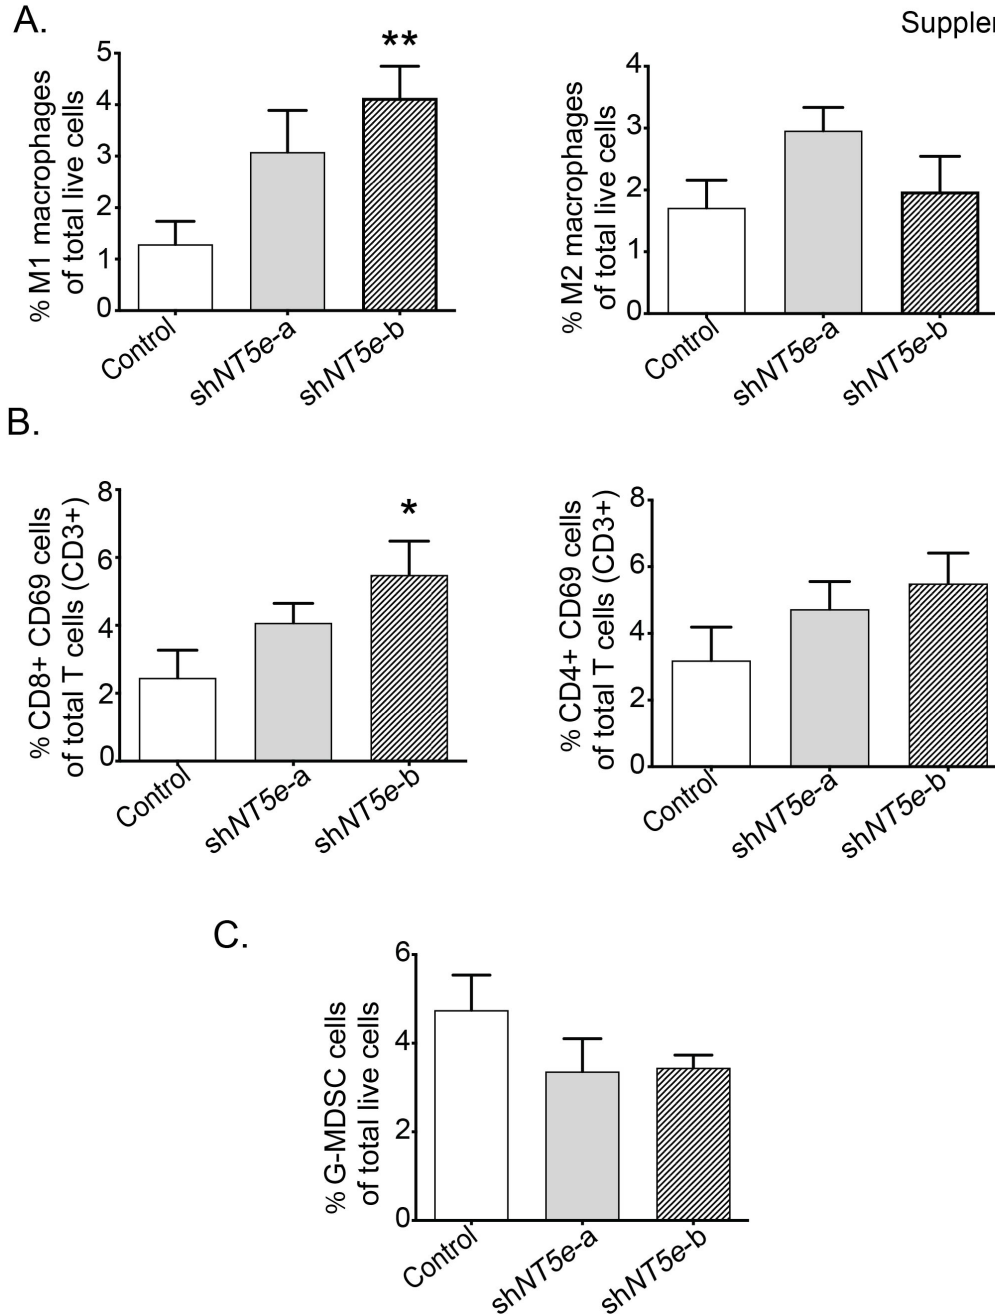

237  
238  
239  
240  
241  
242  
243  
244  
245  
246  
247  
248

**Supplementary Figure 4: *Nt5e* knockdown tumors display increased proportion of M1 macrophages and attenuated levels of M-MDSCs.** B6(Cg)-*Tyr<sup>c-2J</sup>/J* mouse pancreatic tumors from control and *Nt5e* knockdown tumor-bearing mice were harvested and processed for single-cell suspension and stained for surface and intracellular proteins. **A** Proportion of M1 (NOS2<sup>+</sup> F4/80<sup>+</sup> CD11b<sup>+</sup>) macrophages and M2 (Arg1<sup>+</sup> F4/80<sup>+</sup> CD11b) macrophages in *Nt5e* knockdown tumor-bearing mice compared to controls. **B** Activated CD8 T cells (CD8<sup>+</sup> CD69<sup>+</sup>) and CD4 T cells (CD4<sup>+</sup> CD69<sup>+</sup>), respectively in *Nt5e* knockdown tumors. **C** G-MDSCs (Ly6G<sup>+</sup> CD11b<sup>+</sup>) in *Nt5e* knockdown tumors compared to control tumors [control (n=7), shNT5e-a (n=6), shNT5e-b (n=9)]. Bar charts were compared with a one-way ANOVA with Tukey's multiple comparison Test. Error bars depict the standard error of the mean. \*P < 0.05, \*\*P < 0.01.

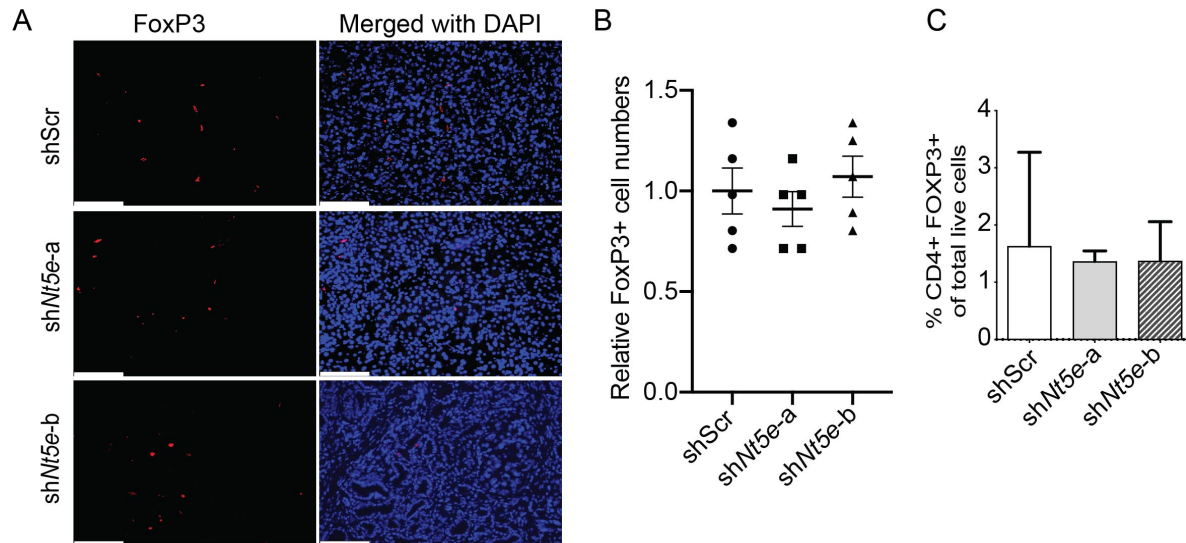

249  
250  
251  
252  
253  
254  
255  
256  
257

**Supplementary Figure 5: FoxP3+ cell numbers in control and *Nt5e* knockdown tumors and circulation.** **A-B** Representative immunofluorescence images (**A**) and quantitation of FoxP3 staining (**B**) in orthotopic tumors from B6(Cg)-*Tyr<sup>c-2J</sup>/J* mice implanted with control and *Nt5e* knockdown KPC1245 cells. Scale bar: 123.4  $\mu$ m. (**C**) Representative bar chart demonstrating circulating Treg population in B6(Cg)-*Tyr<sup>c-2J</sup>/J* mice with control and *Nt5e* knockdown KPC1245 orthotopically implanted tumors [ShScr (n=7), shNt5e (n=8)]. Data was compared by one-way ANOVA with Tukey's multiple comparison test. Error bars depict the standard error of the mean.

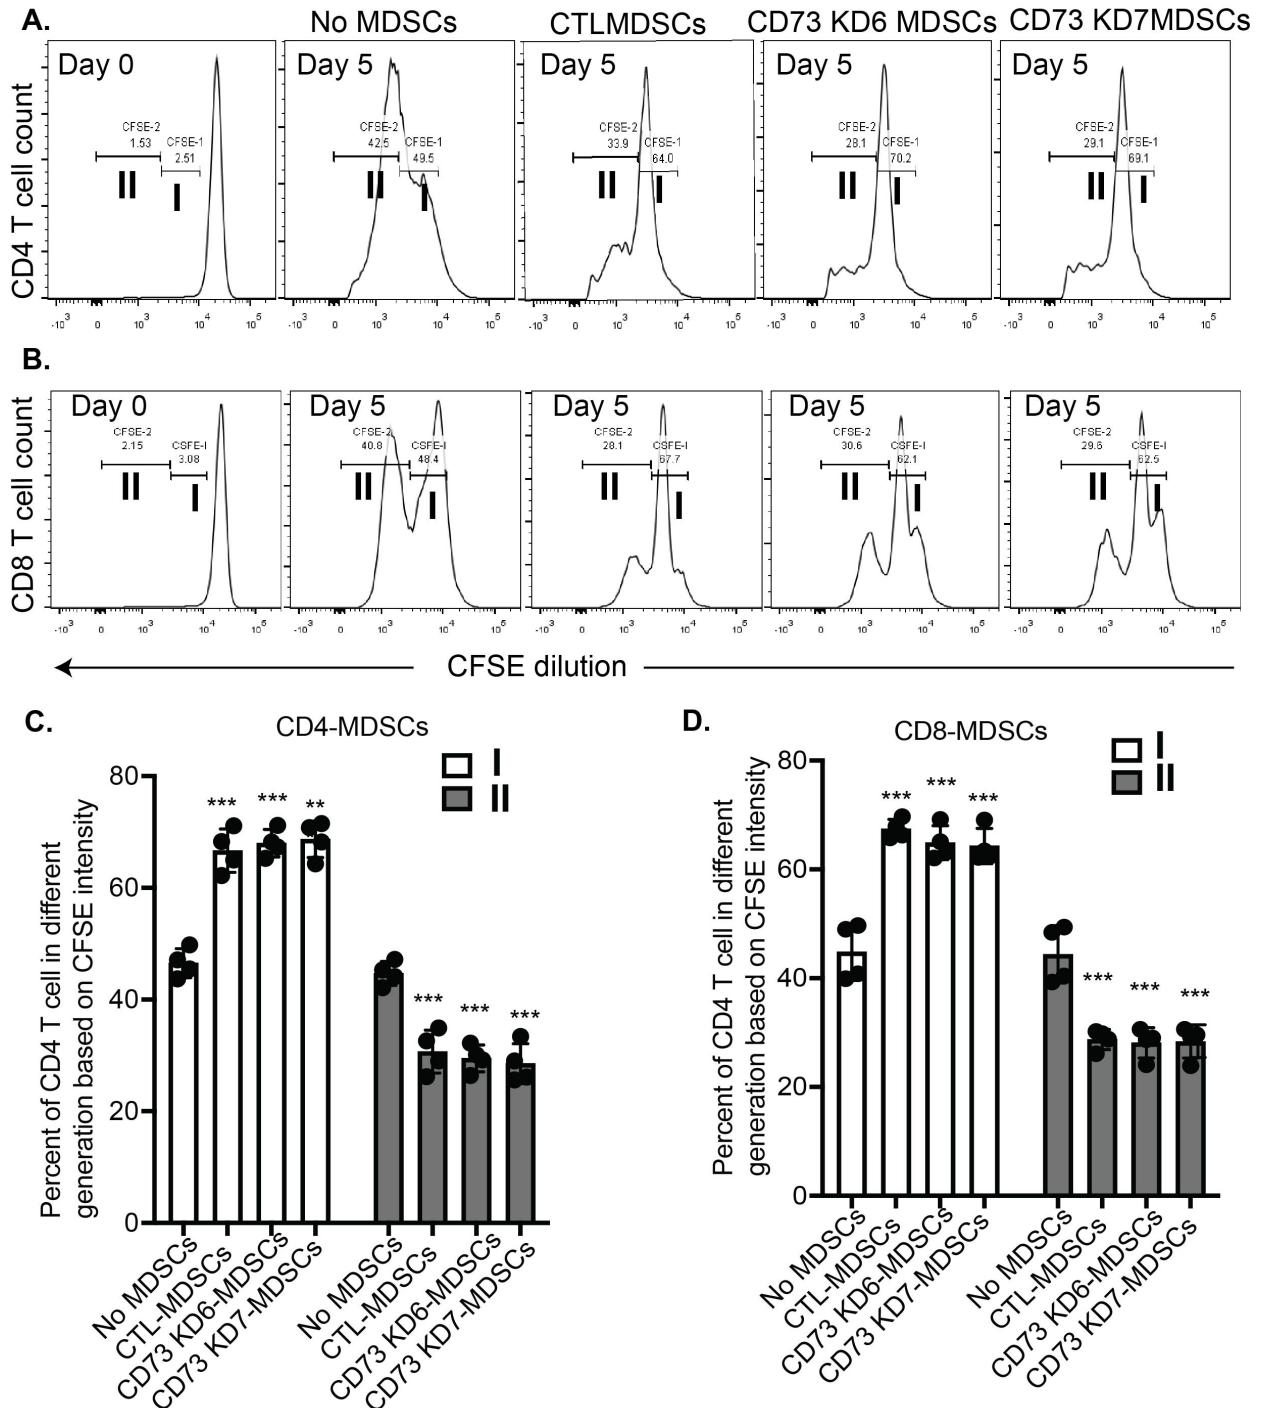

259  
260  
261  
262  
263  
264

**Supplementary Figure 6: CD8 T cell proliferation suppression by MDSCs from tumor-bearing mice.** A-B Representative image depicts suppression of CD4 T cell (A) and CD8 T cell (B) proliferation by MDSCs derived from control and *Nt5e* knockdown tumor-bearing C57BL6/J mice. C-D Bar charts demonstrate the percentage of CFSE+ population in different generations (I, II) in CD4 T cells (C) and CD8 T cells (D) post co-

265 culture with MDSCs. MDSCs were enriched from splenocytes from control or *Nt5e*  
266 knockdown C57BL6/J tumor-bearing mice and co-cultured for 6 days with CFSE-labelled  
267 and previously stimulated (anti-CD3+anti-CD28) naive CD8 T cells, in a 2:1 ratio in the  
268 presence of mouse recombinant IL-2 (20ng/ml). Post incubation, cells were labelled with  
269 anti-CD4 and anti-CD8 antibodies and analyzed by a flow cytometer. Error bars depict  
270 the standard error of the mean. Data was analyzed by ANOVA with Tukey's multiple  
271 comparison test, \*\*\*  $P < 0.001$ .  
272



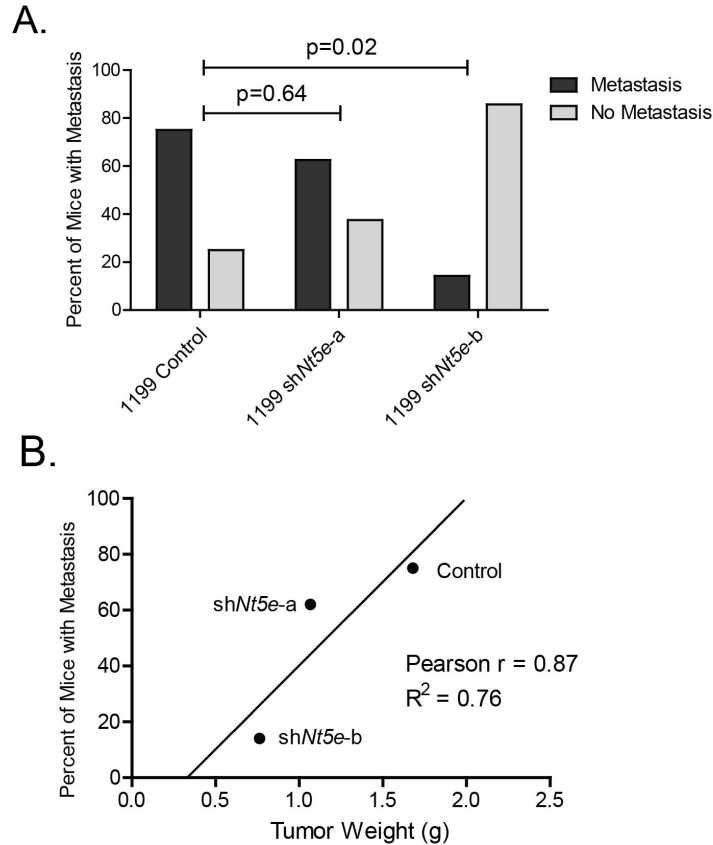

273  
 274 **Supplementary Figure 7: CD73 knockdown decreases metastasis in shNt5e-b**  
 275 **tumor-bearing mice.** **A** Bar chart displaying the percentage of control and *Nt5e*  
 276 knockdown tumor-bearing athymic nude mice exhibiting metastasis with Fisher's exact  
 277 test for significance. **B** Scatter plot showing a positive association between the tumor  
 278 weight and the incidence of metastasis. Data was fit with a linear regression and the  
 279 Pearson's  $r$  is shown, but  $p$  value is not significant. Athymic nude mice were implanted  
 280 with KPC1199 control ( $n=7$ ), *shNt5e-a* ( $n=6$ ), and *shNt5e-b* ( $n=9$ ) cell lines and are the  
 281 mice from Fig. 4A-D.

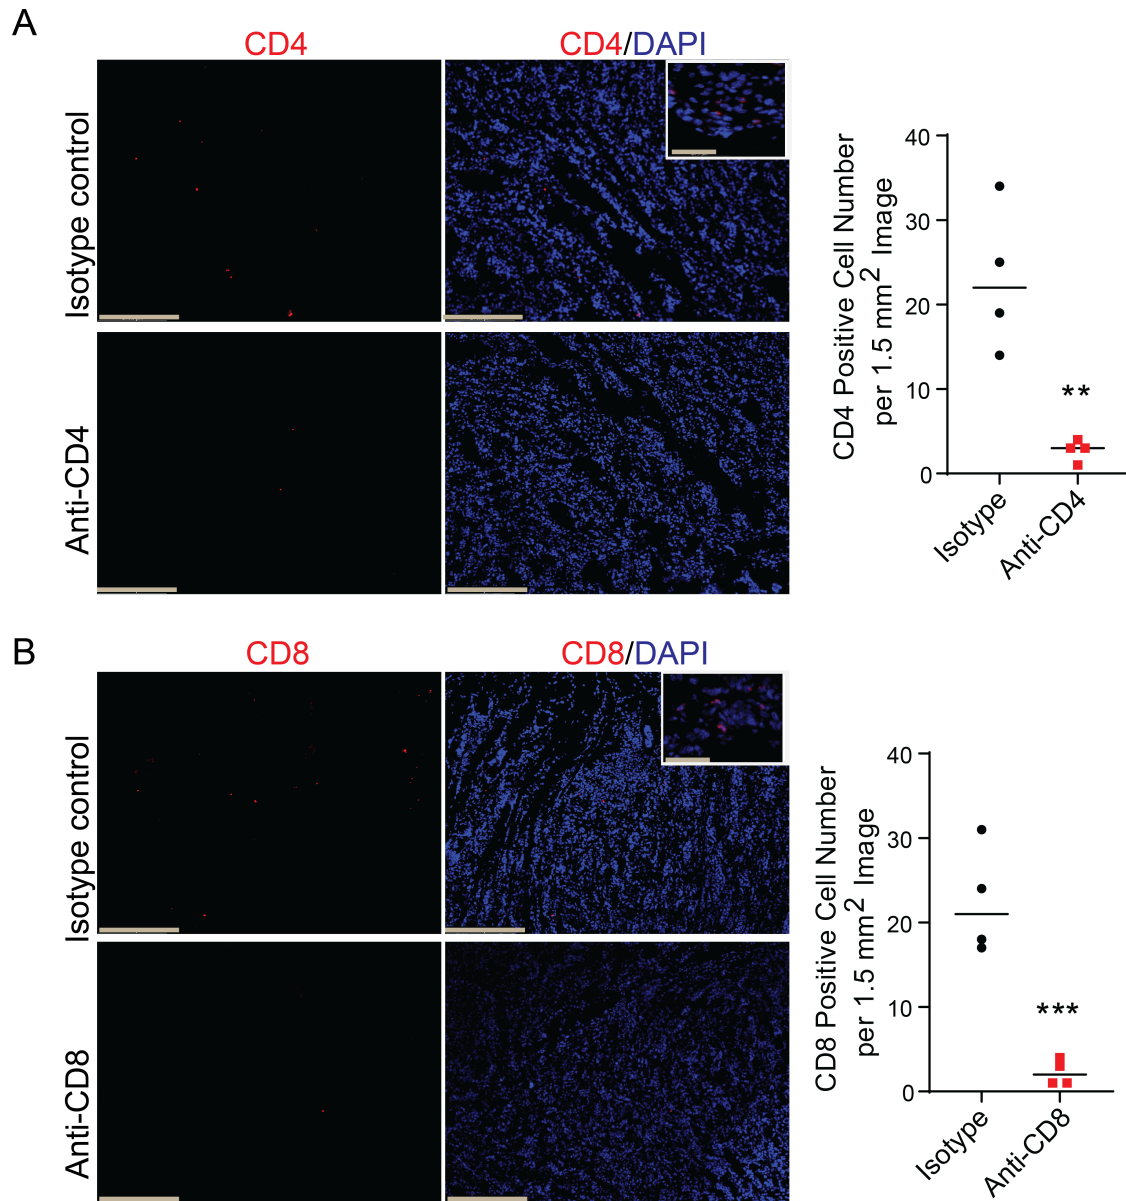

282  
283  
284  
285  
286  
287  
288

**Supplementary Figure. 8: CD8 and CD4 depletion in tumor-bearing mice. A-B** Immunohistochemistry images display CD4 (**A**) and CD8 T cell (**B**) staining in tumors from the isotype control or anti-CD8 and anti-CD4 antibody-treated B6(Cg)-*Tyr<sup>c-2J</sup>/J* mice. Corresponding strip charts demonstrate the frequency of each T cell subtype in different treatment cohorts. Scale bar is 250 $\mu$ m in the 10x images and 56 $\mu$ m in the insets. Data was compared by unpaired t-test. \*P < 0.05, \*\*P < 0.01, \*\*\*P < 0.001.

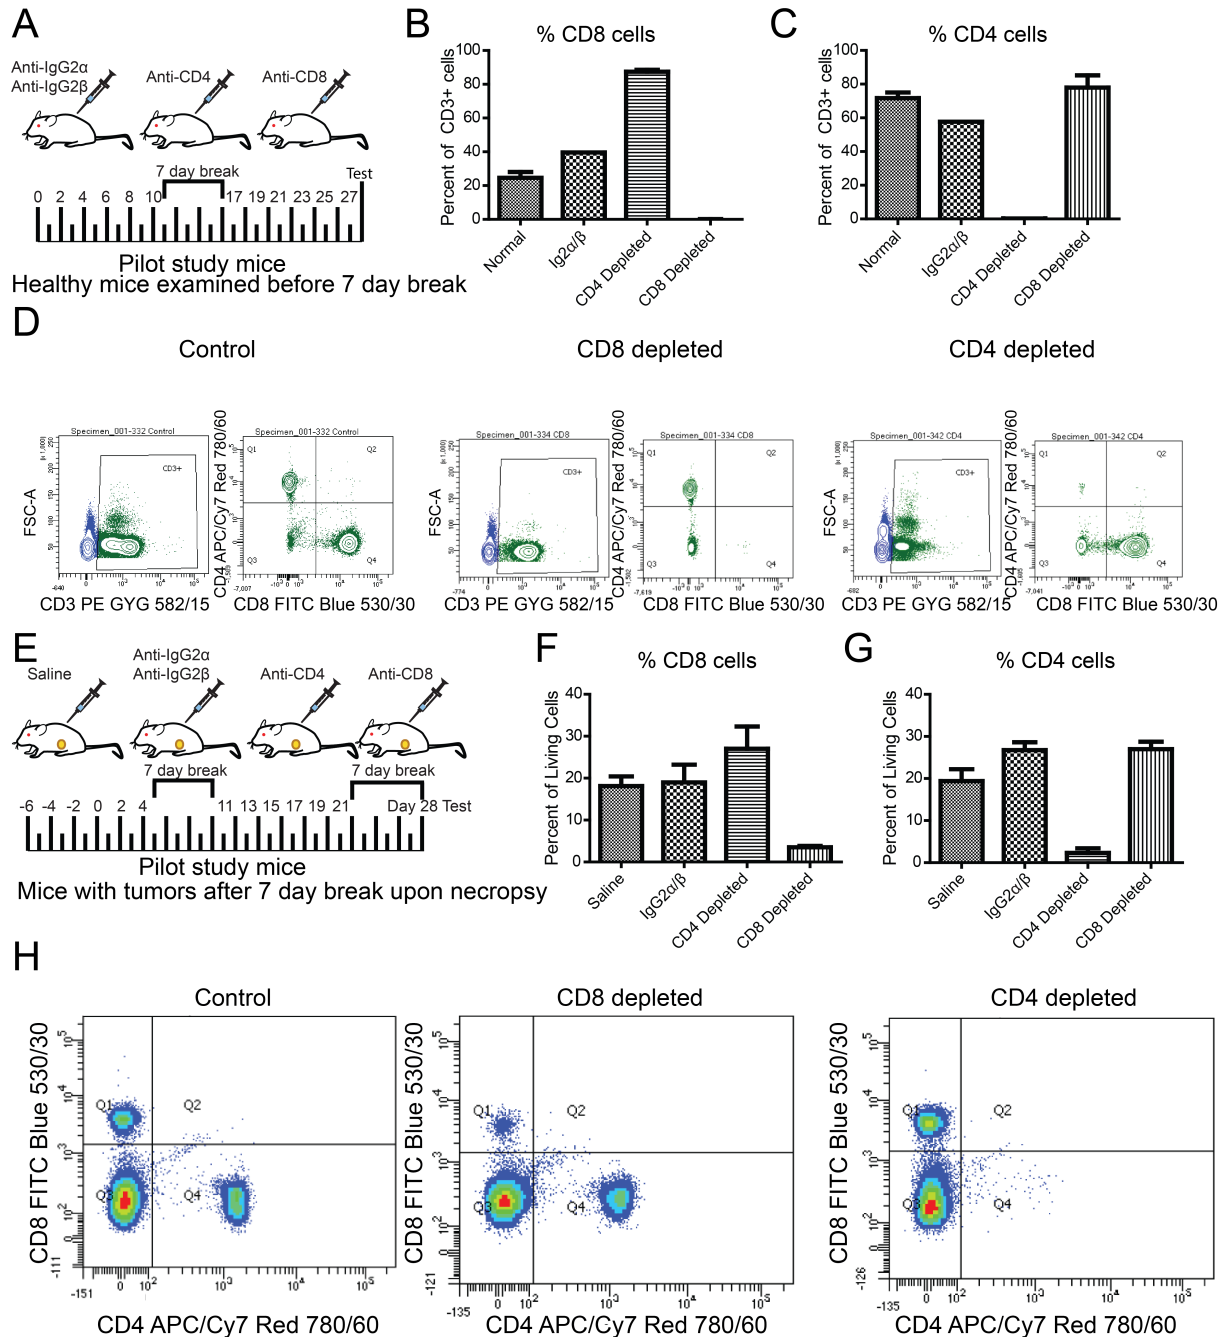

289  
290  
291  
292  
293  
294  
295  
296  
297

**Supplementary Figure 9: Immune depletion validation.** Pilot experiments were carried out to verify CD4 and CD8 $\alpha$  depletion. **A** Layout of the injection schedule and experimental cohorts, which also included healthy age-matched mice as a control (normal). **B-C** Peripheral blood was collected through submandibular bleeding and gated for size, viability, and CD3 $\epsilon$ <sup>+</sup> before gating for CD8 $\alpha$ <sup>+</sup> (**B**) and CD4<sup>+</sup> (**C**). **D** Representative gating after gating for size and viability. **E** Depletion strategy of mice implanted with 5x10<sup>3</sup> KPC1245 cells to examine depletion. **F-G** Submandibular peripheral blood was gated for size, viability, and CD3 $\epsilon$ <sup>+</sup> before gating for CD8 $\alpha$ <sup>+</sup> (**F**) and CD4<sup>+</sup> (**G**). **H** Representative

298 gating after gating for size, viability, and CD3ε<sup>+</sup> cells. Error bars depict the standard error  
 299 of the mean.

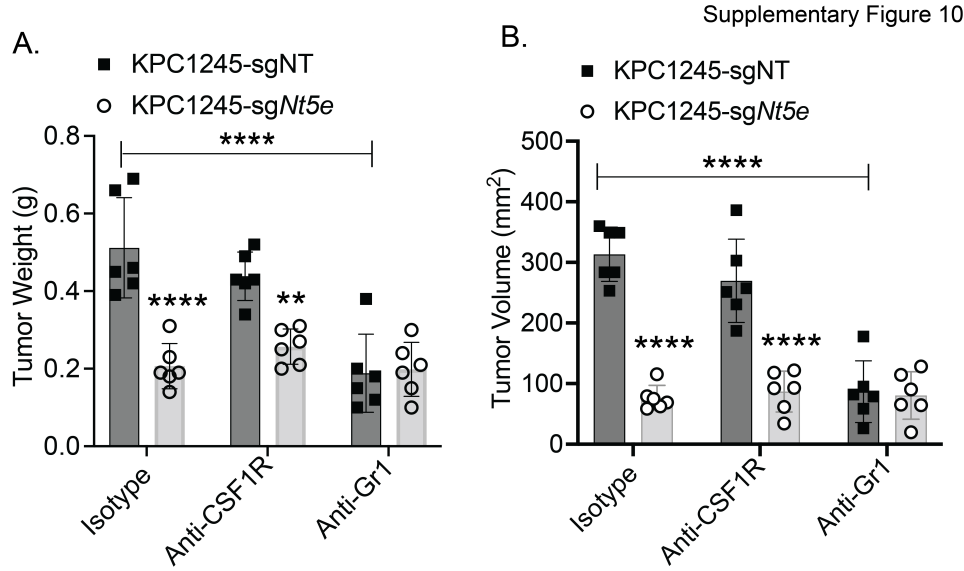

300 **Supplementary Figure 10: MDSC, but not macrophage, depletion attenuates tumor**  
 301 **burden in KPC1245-sgNT control tumor bearing mice.** Bar charts represent tumor  
 302 weight (A) and volume (B) in different treatment cohorts of orthotopic KPC1245-sgNT or  
 303 *Nt5e* knockout (KPC1245-sgCD73) tumor-bearing B6(Cg)-*Tyr<sup>c-2J</sup>/J* mice. Mice were  
 304 treated with anti-CSF1R (200ug, i.p, 3 times per week, starting 2 days prior tumor  
 305 implantation) and anti-Gr-1 (200ug, i.p, every two days starting two days before  
 306 implantation) for depletion of macrophage and MDSCs, respectively. Control mice were  
 307 treated with isotype control Rat IgG2b and Rat IgG2a antibodies, following the dose and  
 308 schedule corresponding to the anti-CSF1R and anti-Gr-1 antibodies. Data was compared  
 309 by two-way ANOVA with Tukey's multiple comparison test. Error bars depict the standard  
 310 error of the mean, \*P < 0.05, \*\*P < 0.01, \*\*\*\*P < 0.0001.  
 311  
 312

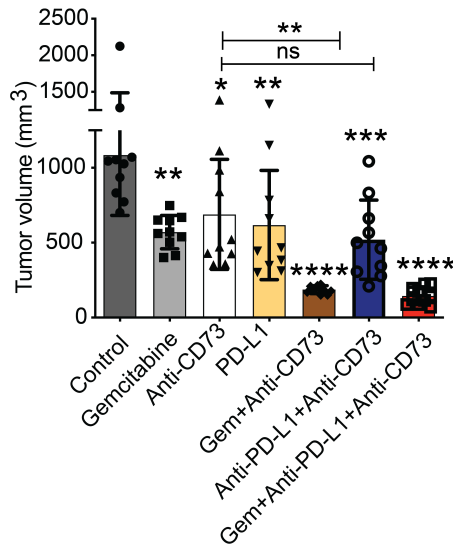

314  
 315  
 316  
 317  
 318  
 319  
 320  
 321  
 322  
 323  
 324  
 325

**Supplementary Figure. 11: Anti-CD73 and gemcitabine combination demonstrates better therapeutic efficacy than anti-CD73 or immune checkpoint blocker (anti-PD-L1) treatments.** Bar chart demonstrates tumor volume at day 28 post orthotopic KPC1245 tumor cell implantation in B6(Cg)-*Tyr<sup>c-2J</sup>/J* male mice. Mice were treated with anti-CD73 (100ug, i.p, three times per week), anti-PD-L1 (200ug, i.p., twice were week) and gemcitabine (50mg/kg, i.p., twice per week in 100μL saline). Data for each set was compared to the control, or as indicated, by one-way ANOVA with Tukey's multiple comparison test. Error bars depict the standard error of the mean, \*P < 0.05, \*\*P < 0.01, \*\*\*P < 0.001, \*\*\*\*P < 0.0001.

326  
327  
328  
329  
330  
331  
332  
333  
334  
335  
336  
337  
338  
339  
340  
341  
342  
343  
344  
345  
346  
347  
348  
349

**Supplementary Tables:**

**Supplementary Table 1. Enzyme survival p-values from mRNA Z-score cohorts.** Pancreatic cancer patients from The Cancer Genome Atlas (TCGA) were split into cohorts based on if the mRNA was lower, similar, or higher than normal mRNA based on if it was more than two standard deviations below (low), above (high), or within (normal) two standard deviations from the normal adjacent tissue mRNA expression. All cohorts were analyzed pairwise or together in the all category. P-values represent the significance of a Mantel-Haenszel log-rank test.

**Supplementary Table 2. Enzyme survival p-values from mRNA interquartile range cohorts.** Pancreatic cancer patients from The Cancer Genome Atlas (TCGA) were split into cohorts based on if the mRNA was in the <25% (low), 25%-75% (normal), or >75% (high) interquartile range. P-values represent the significance of a Mantel-Haenszel log-rank test. All cohorts were analyzed together in the all category.

**Supplementary Table 3. Survival p-values of all available genes from mRNA interquartile range cohorts.** Pancreatic cancer patients from The Cancer Genome Atlas (TCGA) were split into cohorts based on if the mRNA was in the <25% (low), 25%-75% (normal), or >75% (high) interquartile range. P-values represent the significance from a Mantel-Haenszel log-rank test. All cohorts were analyzed pairwise or together in the all category. P-values represent the significance of a Mantel-Haenszel log-rank test.
